# Supplementary material for: Epidemiology and Transmitted HIV-1 Drug Resistance among Treatment-Naïve Individuals in Israel, 2010–2018
Source: MDPI journal article supplement (doi:10.3390/v14010071), 2021-12-31
Supplement: s1 [file s1]

## **Supplementary Material**

### **Supplementary Methods section:**

#### **Detailed phylogenetic and statistical analysis:**

Combined partial PR and RT sequence stripped of drug resistance codons were aligned with early reference sequences from the Los-Alamos database (<https://www.HIV-1.lanl.gov>) using MEGAX (version 10.1.1) (1). General time-reversible model, with the proportion of invariable sites and gamma plus invariant sites-distributed rate heterogeneity (GTR+G+I model), was used based on the results of JModelTest (2) version 2.1.9. Maximum likelihood phylogenetic trees were constructed with branch support assessed from 1000 bootstrap replicates and visualized with Fig Tree version 1.4.4 (<http://tree.bio.ed.ac.uk/software/figtree/>). Only clusters of epidemiologic relevance (with posterior probability > 0.7) were studied. Cluster validation was done as described below (Cluster validation, Tables S1-S3).

Descriptive statistical analysis was used to investigate the study cohort. Variable distribution was determined using the Kolmogorov-Smirnov test. Variables with non-Gaussian abnormal distribution were expressed by median and interquartile range (IQR). To test the quality of means of several distributions, the Kruskal Wallis test was used. For categorical data, chi-squared or Fisher's exact tests were used. The Bonferroni correction was performed for multiple comparisons to avoid the risk of type 1 errors.

Multivariate analysis was assessed by the logistic regression to test factors associated with TDRM by drug class and was based on unstandardized effect-size statistics. All statistically significant ( $p < 0.1$ ) univariate predictors of TDRM (sex, age at diagnosis (<50,  $\geq 50$ ), country of birth (SSA, EEU/CA, Israel, WCEU/NA), risk group (MSM, heterosexual contacts, PWID) and HIV-1 subtypes (B, A1, A6, C, other/recombinants) were all considered in multivariate analysis. Potential interactions were controlled by stratification on effect-measure-modifiers to assess heterogeneity of a measure across the levels of another factor. Predicted values of mean of response of logistic regression were preserved. Subsequently, TDRM probabilities (0.0-1.0) were visualized using R studio by multidimensional mapping. All statistical analysis was performed using IBM SPSS statistics 20 version and R studio version 1.2.1335.

## **Categorization of birthplace**

Birthplace was categorized as follows which was based on <https://aidsinfo.unaids.org/> definition: SSA (Ethiopia, Eritrea, Ghana, Sudan, South Africa ,Kenya), Eastern Europe and Central Asia, EEU/CA, (Russian Federation, Ukraine, Republic of Moldova, Belarus, Armenia, Azerbaijan, Tadzhikistan, Kyrgyzstan, Uzbekistan, Georgia), Western and Central Europe and North America, WCEU/NA (Austria, Belgium, France, Germany, Ireland, Sweden ,United Kingdom, Netherlands, Italy, Poland, Romania, Bulgaria, Hungary, Serbia, Turkey, United States), Other (Morocco, Algeria, Tunisia, Egypt, Iran, Iraq, Kuwait, United Arab Emirates, Costa Rica, Peru, Brazil, Afghanistan, India, Thailand, Colombia, Chile, Australia, Philippine, Mexico, Yemen, Venezuela, Argentina, Taiwan, Uruguay) and Israel.

## **Classification of sub-subtypes A1 and A6**

To classify A subtypes into A1 and A6, the distribution of the pairwise distances between A6\_pol\_reference consensus, A6-POL-LA dataset, and the A1 reference sequences from Africa AB253421 (Rwanda) and AF004885 (Kenya) was measured. A6\_pol\_reference consensus (3) was generated using MutExt software (E.Schülter, University of Cologne) and the Advanced Consensus Maker tool from Los Alamos. A6-POL-LA dataset (3) included accession numbers of sequences from GenBank: EF545108 (Russia), EU861977 (Italy), AF193275 (Belarus), AF413987 (Ukraine). Distribution of pairwise distances was performed by Mega X (1) software version 10.1.1 . Table 1 below depicts the reference sequences used for this analysis.

## **Cluster validation**

Clusters inferred from phylogenetic analysis were validated by repeating the analysis for subtype A, subtype B and subtype C with additional closely related reference sequences (Supplementary Table 3), as follows. A representative sequence was chosen from each cluster and the 10 most closely related sequences to the representative sequence were obtained using the Blastn sequence analysis tool ([https://www.HIV-1.lanl.gov/content/sequence/BASIC\\_BLAST/basic\\_blast.html](https://www.HIV-1.lanl.gov/content/sequence/BASIC_BLAST/basic_blast.html))(4), and added as control references (after removing the duplicate sequences). Overall, 119 unique sequences were chosen to validate the clusters (Supplementary Table S3). Drug resistance codons were

stripped from the new references to remove biases and all sequences for each subtype were aligned using Clustal Omega. Then phylogenetic analysis was repeated for A, B, C PR/RT sequences and Maximum likelihood phylogenetic trees were constructed using MEGAX (GTR+G+I model) with branch support assessed from 1000 bootstrap and visualized again. Bootstrap values  $\geq 70$  were considered significant.

Phylogenetic analysis was visualized using FigTree

(<http://tree.bio.ed.ac.uk/software/figtree>).

**Supplementary Table S1:** Reference sequences used in the phylogenetic analysis.

| Subtype                 | GenBank ref#      | Country              | Year |
|-------------------------|-------------------|----------------------|------|
| A1                      | AF004885          | Kenya                | 1994 |
| A1                      | AB253421          | Rwanda               | 1992 |
| A6 <i>pol</i> consensus | A6-POL-LA dataset |                      |      |
| A6                      | EF545108          | Russia               | 2007 |
| A6                      | EU861977          | Italy                | 2008 |
| A6                      | AF193275          | Belarus              | 1999 |
| A6                      | AF413987          | Ukraine              | 2003 |
| B                       | AY173951          | Thailand             | 1990 |
| C                       | AY772699          | South Africa: Durban | 2004 |

**Supplementary Table S2:** Number and length (bp) of sequences that were included in the phylogenetic trees.

|                     | HIV-1 subtypes |     |     |
|---------------------|----------------|-----|-----|
|                     | A              | B   | C   |
| Number of sequences | 482            | 732 | 313 |
| Alignment length    | 826            | 833 | 900 |

| Subtype C                              |                                        |                                          |                                        |
|----------------------------------------|----------------------------------------|------------------------------------------|----------------------------------------|
| C Cluster 1<br>North Israel            | C Cluster 2<br>Other                   | C Cluster 3<br>additional                | C Cluster 4<br>clusters                |
| <b>Representative:<br/>56843,69662</b> | <b>Representative:<br/>78873,67083</b> | <b>Representative:<br/>85894,1000302</b> | <b>Representative:<br/>85304,59421</b> |
| C.AT. KU574296                         | C.AT. KU574306                         | C.AT. KU574373                           | C.AT. KU574426                         |
| C.AT. KU574301                         | C.AT. KU574532                         | C.AT. KU574452                           | C.GB.2008.KU498602                     |
| C.AT. KU574391                         | C.CG.2006. KP889083                    | C.AT. KU574472                           | C.ZA.2009. KT032008                    |
| C.AT. KU574433                         | C.GB.2007.KU499113                     | C.BR.2009.KT746965                       | C.ZA.2009. KT032010                    |
| C.AT. KU574441                         | C.GB.2007.KU499180                     | C.GB.2008.KU498735                       |                                        |
| C.AT. KU574448                         | C.GB.2008.KU498846                     | C.SE.1998.AF396682                       |                                        |
| C.ZA.2008. KT032000                    | C.ZA.2008. KT032004                    | C.ZA.2008.KT032007                       |                                        |
| C.ZA.2010. KT032021                    |                                        |                                          |                                        |

**Supplementary Table S3:** Additional Control reference sequences for phylogenetic analysis cluster validation

Accession numbers for reference sequences most closely related to a representative sequence in each of the clusters in subtypes A, B and C are listed. Representative sequences for each cluster (e.g. 1000403, 1000325) are highlighted in green shade.

Sequences were located via BLAST program:

([https://www.hiv.lanl.gov/content/sequence/BASIC\\_BLAST/basic\\_blast.html](https://www.hiv.lanl.gov/content/sequence/BASIC_BLAST/basic_blast.html)).

| Subtype A                               |                                       |
|-----------------------------------------|---------------------------------------|
| A1 Cluster 1                            | A6 Cluster 2                          |
| <b>Representative : 1000403,1000325</b> | <b>Representative : 83992,1000569</b> |
| A1.AT. KU574351                         | A6.AT. KU574304                       |
| A1.AT. KU574371                         | A6.AT. KU574406                       |
| A1.AT. KU574399                         | A6.AT. KU574408                       |
| A1.AT. KU574416                         | A6.AT. KU574435                       |
| A1. CG. 2006. KP889067                  | A6.AT. KU574447                       |
| A1. CG. 2006. KP889095                  | A6.AT. KU574474                       |
| A1. GB. 2007. KU498360                  | A6.AT. KU574479                       |
| A1. GB. 2007. KU498444                  | A6.AT. KU574480                       |
| A1. GB. 2008. KU498382                  | A6.AT. KU574512                       |
| A1. GR. 2004.GQ399093                   | A6. PL. 2000. KM057339                |

| Subtype B                                           |                                                 |                                               |                                               |                                               |
|-----------------------------------------------------|-------------------------------------------------|-----------------------------------------------|-----------------------------------------------|-----------------------------------------------|
| B Cluster 1                                         | B Cluster 2                                     | B Cluster 3                                   | B Cluster 4                                   | B Cluster 5                                   |
| <b>Representative:<br/>1000438,87274,<br/>62828</b> | <b>Representative:<br/>1000369,<br/>1000443</b> | <b>Representative:<br/>1000425,<br/>68738</b> | <b>Representative:<br/>1000661,<br/>73960</b> | <b>Representative:<br/>84576,<br/>1000631</b> |
| B.IL.2007.KM984944                                  | B.IL.2005.KM985286                              | B.IL.2005.KM984931                            | B.IL.2008.KM985160                            | B.IL.2008.KM984988                            |
| B.IL.2007.KM985118                                  | B.IL.2006.KM985283                              | B.IL.2009.KM985002                            | B.IL.2008.KM985216                            | B.IL.2009.KM984936                            |
| B.IL.2008.KM984993                                  | B.IL.2007.KM985078                              | B.IL.2009.KM985238                            | B.IL.2008.KM985220                            | B.IL.2009.KM985032                            |
| B.IL.2008.KM985037                                  | B.IL.2009.KM985021                              | B.IL.2009.KM985342                            | B.IL.2009.KM984975                            | B.IL.2009.KM985054                            |
| B.IL.2008.KM985282                                  | B.IL.2009.KM985146                              | B.IL.2012.KM985052                            | B.IL.2009.KM985072                            | B.IL.2009.KM985113                            |
| B.IL.2009.KM985024                                  | B.IL.2009.KM985321                              | B.IL.2012.KM985228                            | B.IL.2010.KM985317                            | B.IL.2009.KM985142                            |
| B.IL.2009.KM985105                                  | B.IL.2010.KM985074                              | B.IL.2012.KM985275                            | B.IL.2011.KM985340                            | B.IL.2009.KM985206                            |
| B.IL.2009.KM985256                                  | B.IL.2011.KM984926                              | B.IL.2012.KM985315                            | B.IL.2013.KM984923                            | B.IL.2010.KM984978                            |
| B.IL.2009.KM985270                                  | B.IL.2011.KM984995                              | B.IL.2012.KM985323                            | B.IL.2013.KM984958                            | B.IL.2010.KM985025                            |

|                    |                    |                    |                    |                    |
|--------------------|--------------------|--------------------|--------------------|--------------------|
| B.IL.2009.KM985307 | B.IL.2012.KM984899 | B.IL.2013.KM985234 | B.IL.2014.KM985144 | B.IL.2011.KM985316 |
| B.IL.2010.KM985007 | B.IL.2012.KM985143 | B.IL.2013.KM985269 |                    | B.IL.2012.KM985200 |
| B.IL.2010.KM985071 | B.IL.2012.KM985332 | B.IL.2014.KM985313 |                    | B.IL.2013.KM985221 |
| B.IL.2011.KM984984 | B.IL.2012.KM985345 |                    |                    |                    |
| B.IL.2011.KM985188 | B.IL.2013.KM985257 |                    |                    |                    |
| B.IL.2011.KM985211 |                    |                    |                    |                    |
| B.IL.2011.KM985291 |                    |                    |                    |                    |
| B.IL.2012.KM985035 |                    |                    |                    |                    |
| B.IL.2012.KM985258 |                    |                    |                    |                    |
| B.IL.2012.KM985325 |                    |                    |                    |                    |
| B.IL.2013.KM984933 |                    |                    |                    |                    |
| B.IL.2013.KM985039 |                    |                    |                    |                    |
| B.IL.2013.KM985084 |                    |                    |                    |                    |
| B.IL.2013.KM985111 |                    |                    |                    |                    |
| B.IL.2014.KM985309 |                    |                    |                    |                    |

## Bibliography

1. Kumar S, Stecher G, Li M, Knyaz C, Tamura K. MEGA X: Molecular evolutionary genetics analysis across computing platforms. *Mol Biol Evol.* 2018 Jun 1;35(6):1547–1549.
2. Posada D. jModelTest: phylogenetic model averaging. *Mol Biol Evol.* 2008 Jul;25(7):1253–1256.
3. Schlösser M, Kartashev VV, Mikkola VH, Shemshura A, Saukhat S, Kolpakov D, et al. HIV-1 Sub-Subtype A6: Settings for Normalised Identification and Molecular Epidemiology in the Southern Federal District, Russia. *Viruses.* 2020 Apr 22;12(4).
4. Altschul SF, Madden TL, Schäffer AA, Zhang J, Zhang Z, Miller W, et al. Gapped BLAST and PSI-BLAST: a new generation of protein database search programs. *Nucleic Acids Res.* 1997 Sep 1;25(17):3389–3402.



|                 |                       |              |            |             |             |             |              |                   |             |             |            |            |            |            |           |               |               |                      |                      |                |                |              |                     |               |              |               |
|-----------------|-----------------------|--------------|------------|-------------|-------------|-------------|--------------|-------------------|-------------|-------------|------------|------------|------------|------------|-----------|---------------|---------------|----------------------|----------------------|----------------|----------------|--------------|---------------------|---------------|--------------|---------------|
|                 | T215AD<br>EFILNS<br>Y | 34<br>(1.8)  | 1 (2.2)    | 5 (1.1)     | 19<br>(2.3) | 6 (1.9)     | 2 (1.5)      |                   | 1 (1.1)     | 0.516       | 0.965      | 0.136      | 0.890      | 0.362      | 0.678     | 0.751         | 0.8           |                      |                      | 0.619          | 1.000          | 0.557        |                     | 0.467         | 0.769        | 0.612         |
|                 | K219EQ<br>R           | 6 (0.3)      |            | 3 (0.7)     | 2 (0.2)     |             | 1 (0.7)      |                   |             |             |            | 0.163      |            |            |           |               | 1.000         |                      |                      |                | 0.478          |              |                     |               |              |               |
| NNRTI,<br>n (%) | A98G                  | 14<br>(0.7)  |            | 2 (0.5)     | 3 (0.4)     | 8 (2.5)     |              |                   | 1 (1.1)     |             |            | 0.797      |            | 0.019      | 0.001     |               |               |                      |                      | 0.509          |                |              | 0.362               |               | 0.431        |               |
|                 | K101E                 | 3 (0.2)      |            |             | 1 (0.1)     | 1 (0.3)     |              | 1 (2.3)           |             |             |            |            |            |            | 0.456     |               |               |                      |                      |                |                | 0.003        |                     |               |              |               |
|                 | K103NS                | 94<br>(4.9)  | 22<br>(48) | 5 (1.1)     | 54<br>(6.4) | 7 (2.2)     | 3 (2.2)      |                   | 3 (3.4)     | <<br>0.001  | <<br>0.001 | 0.004      | <<br>0.001 | 0.230      | 0.009     | <<br>0.001    | 0.337         |                      |                      | <<br>0.001     | 0.105          | 0.078        |                     | 0.337         | 1.000        | 0.522         |
|                 | K103N                 | 86<br>(4.5)  | 16<br>(35) | 5 (1.1)     | 53<br>(6.3) | 7 (2.2)     | 2 (1.5)      |                   | 3 (3.4)     | <<br>0.001  | <<br>0.001 | <<br>0.001 | <<br>0.001 | 0.230      | 0.005     | <<br>0.001    | 0.710         |                      |                      | <<br>0.001     | 0.105          | 0.025        |                     | 0.280         | 0.627        | 0.522         |
|                 | K103S                 | 8 (0.4)      | 6 (13)     |             | 1 (0.1)     |             | 1 (0.7)      |                   |             |             | <<br>0.001 |            |            |            |           | <<br>0.001    |               |                      |                      |                |                | 0.131        |                     |               |              |               |
|                 | V106AM                | 4 (0.2)      |            | 2 (0.5)     |             | 2 (0.6)     |              |                   |             |             |            |            |            | 0.854      |           |               |               |                      |                      |                |                |              |                     |               |              |               |
|                 | V108I                 | 5 (0.3)      |            | 2 (0.5)     | 3 (0.4)     |             |              |                   |             |             |            | 0.797      |            |            |           |               |               |                      |                      |                |                |              |                     |               |              |               |
|                 | E138AG<br>KQ          | 109<br>(5.7) | 25(54)     | 23<br>(5.3) | 25 (3)      | 13<br>(4.1) | 19<br>(14)   | 1 (2.3)           | 3 (3.4)     | <<br>0.001  | <<br>0.001 | 0.041      | <<br>0.001 | 0.447      | 0.350     | <<br>0.001    | <<br>0.001    | <<br>0.001           | 0.391                | <<br>0.001     | 0.458          | <<br>0.001   | 0.792               | 0.836         | <<br>0.001   | 0.767         |
|                 | E138A                 | 70<br>(3.7)  | 1 (2.2)    | 17<br>(3.9) | 21<br>(2.5) | 10<br>(3.1) | 17<br>(12.7) | 1 (2.3)           | 3 (3.4)     | 0.564       | 0.900      | 0.163      | 0.738      | 0.559      | 0.572     | 0.041         | <<br>0.001    | <<br>0.975           | 0.599                | 0.700          | 0.824          | <<br>0.001   | 0.572               | 0.615         | <<br>0.001   | 0.888         |
|                 | E138G                 | 10<br>(0.5)  | 2 (4.3)    | 4 (0.9)     | 1 (0.1)     | 2 (0.6)     | 1 (0.7)      |                   |             | 0.046       | <<br>0.001 | 0.026      | 0.023      | 0.642      | 0.119     | 0.096         | 0.826         |                      |                      |                |                | 0.131        |                     | 0.902         |              |               |
|                 | E138K                 | 3 (0.2)      |            | 1 (0.2)     | 1 (0.1)     | 1 (0.3)     |              |                   |             |             |            | 0.644      |            | 0.783      | 0.440     |               |               |                      |                      |                |                |              |                     |               |              |               |
|                 | E138Q                 | 26<br>(1.4)  | 22<br>(48) | 1 (0.2)     | 2 (0.2)     |             | 1 (0.7)      |                   |             | <<br>0.001  | <<br>0.001 | 1.000      |            |            |           | <<br>0.001    | 0.369         |                      |                      |                |                | 0.299        |                     |               |              |               |
|                 | V179DE<br>L           | 22<br>(1.1)  |            | 7 (1.6)     | 7 (0.8)     | 3 (0.9)     | 4 (3)        | 1 (1.1)           |             |             |            | 0.189      |            | 0.403      | 0.867     |               | 0.303         |                      |                      | 0.728          | 0.024          |              | 0.769               | 0.096         | 0.864        |               |
|                 | Y181CI                | 11<br>(0.6)  |            | 3 (0.7)     | 3 (0.4)     | 5 (1.6)     |              |                   |             |             |            | 0.472      |            | 0.238      | 0.039     |               |               |                      |                      |                |                |              |                     |               |              |               |
|                 | Y188CL                | 2 (0.1)      |            | 1 (0.2)     |             | 1 (0.3)     |              |                   |             |             |            |            |            | 0.783      |           |               |               |                      |                      |                |                |              |                     |               |              |               |
|                 | G190AS                | 7 (0.4)      |            | 1 (0.2)     |             | 5 (1.6)     | 1 (0.7)      |                   |             |             |            |            |            | 0.032      |           |               | 0.369         |                      |                      |                |                |              |                     | 0.447         |              |               |
|                 | H221Y                 | 3 (0.2)      |            |             | 3 (0.4)     |             |              |                   |             |             |            |            |            |            |           |               |               |                      |                      |                |                |              |                     |               |              |               |
|                 | P225H                 | 1 (0.1)      | 1 (2.2)    |             |             |             |              |                   |             |             |            |            |            |            |           |               |               |                      |                      |                |                |              |                     |               |              |               |
|                 | K238NT                | 4 (0.2)      |            | 2 (0.5)     |             | 2 (0.6)     |              |                   |             |             |            |            |            | 0.854      |           |               |               |                      |                      |                |                |              |                     |               |              |               |
| INSTI, n<br>(%) |                       | N=<br>479    | A1<br>8    | A6<br>112   | B<br>202    | C<br>65     | G AG<br>48   | AE,<br>A/AE<br>10 | other<br>34 | A1 vs<br>A6 | A1 vs<br>B | A6 vs<br>B | A1 vs<br>C | A6 vs<br>C | B vs<br>C | A1 vs<br>G AG | A6 vs<br>G AG | A1 vs<br>AE,<br>A/AE | A6 vs<br>AE,<br>A/AE | A1 vs<br>other | A6 vs<br>other | B vs<br>G AG | B vs<br>AE,<br>A/AE | B vs<br>other | C vs<br>G AG | C vs<br>other |
|                 | L74I                  | 44<br>(9.2)  |            | 38<br>(34)  | 3 (1.5)     | 1 (1.5)     | 2 (4.2)      |                   |             |             |            | <<br>0.001 |            | <<br>0.001 | 1.000     |               | <<br>0.001    |                      |                      |                |                | 0.233        |                     |               | 0.380        |               |
|                 | L74V                  | 3 (0.6)      | 3 (38)     |             |             |             |              |                   |             |             |            |            |            |            |           |               |               |                      |                      |                |                |              |                     |               |              |               |
|                 | T97A                  | 7 (1.5)      |            | 1 (0.9)     | 2 (1)       | 2 (3.1)     | 2 (4.2)      |                   |             |             |            | 0.931      |            | 0.278      | 0.228     |               | 0.161         |                      |                      |                |                | 0.115        |                     |               | 0.756        |               |
|                 | E157Q                 | 6 (1.3)      |            |             | 3 (1.5)     | 1 (1.5)     | 1 (2.1)      |                   | 1 (2.9)     |             |            |            |            |            | 1.000     |               |               |                      |                      |                |                | 0.767        |                     | 0.560         | 0.811        | 0.637         |
|                 | G163KR                | 3 (0.6)      |            |             |             |             |              |                   | 3 (8.8)     |             |            |            |            |            |           |               |               |                      |                      |                |                |              |                     |               |              |               |

TDRM, transmitted drug resistance mutations are highlighted in bold blue; HIVdrn- HIV-1 drug resistance mutations; NRTI, nucleoside reverse transcriptase inhibitors; NNRTI, non-nucleoside transcriptase inhibitors; PI, protease inhibitors; INSTI – integrase strand transfer inhibitors. Data are presented as n (%). Differences in proportions were measured using the chi-squared test. Empty cells, n=zero.

**Supplementary Table S5:** Interactions and main effects of variables related to TDRM  
Supplementary S5a. Variables related to overall TDRM

| Interactions                                   |              |                       |          | Main effects |                       |          |
|------------------------------------------------|--------------|-----------------------|----------|--------------|-----------------------|----------|
| Variables                                      | Coefficients | OR (95% CI)           | <i>p</i> | Coefficients | OR (95% CI)           | <i>p</i> |
| Age (<50) * HIV-1 subtype A1                   | 2.457        | 11.671 (6.010-22.666) | <0.001   |              |                       |          |
| Age (<50)                                      |              |                       |          | -0.310       | 0.733 (0.512-1.049)   | 0.090    |
| HIV-1 subtype A1                               |              |                       |          | 2.350        | 10.489 (5.752-19.126) | <0.001   |
| Age (≥50) * HIV-1 Subtype A1                   | 2.139        | 8.488 (2.103-34.256)  | 0.003    |              |                       |          |
| Age (≥50)                                      |              |                       |          | 0.310        | 1.364 (0.953-1.952)   | 0.090    |
| HIV-1 subtype A1                               |              |                       |          | 2.350        | 10.489 (5.752-19.126) | <0.001   |
| Age (<50) * Sex (male)                         | 0.534        | 1.705 (1.120-2.596)   | 0.013    |              |                       |          |
| Age (<50)                                      |              |                       |          | -0.310       | 0.733 (0.512-1.049)   | 0.090    |
| Sex (male)                                     |              |                       |          | 0.335        | 1.397 (0.978-1.996)   | 0.066    |
| Age (≥50) * Sex (male)                         | 0.962        | 2.618 (1.281-5.349)   | 0.008    |              |                       |          |
| Age (≥50)                                      |              |                       |          | 0.310        | 1.364 (0.953-1.952)   | 0.090    |
| Sex (male)                                     |              |                       |          | 0.335        | 1.397 (0.978-1.996)   | 0.066    |
| Age (<50) * Birthplace (IL)                    | 0.728        | 2.071 (1.498-2.863)   | <0.001   |              |                       |          |
| Age (<50)                                      |              |                       |          | -0.310       | 0.733 (0.512-1.049)   | 0.090    |
| Birthplace (IL)                                |              |                       |          | 0.476        | 1.610 (1.216-2.133)   | 0.001    |
| Birthplace (EEU/CA) * Transmission mode (PWID) | -0.703       | 0.495 (0.270-0.909)   | 0.023    |              |                       |          |
| Birthplace (EEU/CA)                            |              |                       |          | -0.572       | 0.564 (0.393-0.810)   | 0.002    |
| Transmission mode (PWID)                       |              |                       |          | -0.629       | 0.533 (0.319-0.892)   | 0.017    |
| Sex (Male) * HIV-1 subtype A1                  | 2.598        | 13.431 (6.556-27.516) | <0.001   |              |                       |          |
| Sex (male)                                     |              |                       |          | 0.335        | 1.397 (0.978-1.996)   | 0.066    |
| HIV-1 subtype A1                               |              |                       |          | 2.350        | 10.489 (5.752-19.126) | <0.001   |



|                                             |        |                       |        |        |                       |        |
|---------------------------------------------|--------|-----------------------|--------|--------|-----------------------|--------|
| Sex (female) * HIV-1 subtype A1             | 2.627  | 13.838 (2.983-64.194) | 0.001  |        |                       |        |
| Sex (female)                                |        |                       |        | -0.334 | 0.716 (0.502-1.023)   | 0.067  |
| HIV-1 subtype A1                            |        |                       |        | 2.350  | 10.489 (5.752-19.126) | <0.001 |
| Birthplace (IL) * HIV-1 subtype A1          | 2.570  | 13.064 (6.571-25.972) | <0.001 |        |                       |        |
| Birthplace (IL)                             |        |                       |        | 0.476  | 1.610 (1.216-2.133)   | 0.001  |
| HIV-1 subtype A1                            |        |                       |        | 2.350  | 10.489 (5.752-19.126) | <0.001 |
| Transmission mode (PWID) * HIV-1 subtype A6 | -1.069 | 0.343 (0.172-0.683)   | 0.002  |        |                       |        |
| Transmission mode (PWID)                    |        |                       |        | -0.629 | 0.533 (0.319-0.892)   | 0.017  |
| HIV-1 subtype A6                            |        |                       |        | -0.635 | 0.530 (0.364-0.772)   | 0.001  |

Supplementary S5b. Variables related to NNRTI TDRM

| Interactions                                |              |                        |          | Main effects |                        |          |
|---------------------------------------------|--------------|------------------------|----------|--------------|------------------------|----------|
| Variables                                   | Coefficients | OR (95% CI)            | <i>p</i> | Coefficients | OR (95% CI)            | <i>p</i> |
| Birthplace (IL) * HIV-1 subtype A1          | 3.414        | 30.889 (14.717-62.752) | <0.001   |              |                        |          |
| Birthplace (IL)                             |              |                        |          | 0.686        | 1.986 (1.357-2.905)    | <0.001   |
| HIV-1 Subtype A1                            |              |                        |          | 3.042        | 20.940 (11.331-38.700) | <0.001   |
| Birthplace (EEU/CA) * HIV-1 subtype A6      | -1.231       | 0.292 (0.141-0.606)    | 0.001    |              |                        |          |
| Birthplace (EEU/CA)                         |              |                        |          | -0.882       | 0.414 (0.242-0.707)    | 0.001    |
| HIV-1 subtype A6                            |              |                        |          | -0.080       | 0.340 (0.185-0.622)    | <0.001   |
| Transmission mode (PWID) * HIV-1 subtype A6 | -2.654       | 0.070 (0.010-0.507)    | 0.008    |              |                        |          |
| Transmission mode (PWID)                    |              |                        |          | -1.069       | 0.343 (0.149-0.788)    | 0.012    |
| HIV-1 subtype A6                            |              |                        |          | -0.080       | 0.340 (0.185-0.622)    | <0.001   |

Supplementary S5c. Variables related to PI TDRM

| Interactions                                                    |              |                     |          | Main effects |                     |          |
|-----------------------------------------------------------------|--------------|---------------------|----------|--------------|---------------------|----------|
| Variables                                                       | Coefficients | OR (95% CI)         | <i>p</i> | Coefficients | OR (95% CI)         | <i>p</i> |
| Birthplace (IL) * Sex (male)                                    | 0.792        | 2.209 (1.027-4.753) | 0.043    |              |                     |          |
| Birthplace (IL)                                                 |              |                     |          | 0.482        | 1.619 (0.922-2.643) | 0.054    |
| Sex (male)                                                      |              |                     |          | 0.703        | 2.020 (0.995-4.101) | 0.052    |
| Birthplace (EEU/CA) *<br>Transmission mode (sexual<br>contacts) | -1.312       | 0.269 (0.083-0.872) | 0.029    |              |                     |          |
| Birthplace (EEU/CA)                                             |              |                     |          | -0.527       | 0.590 (0.315-1.108) | 0.101    |
| Transmission mode (sexual<br>contacts)                          |              |                     |          | -0.814       | 0.443 (0.241-0.815) | 0.009    |
| Transmission mode (sexual<br>contacts) * HIV-1 subtype<br>A6    | -1.601       | 0.202 (0.049-0.835) | 0.027    |              |                     |          |
| Transmission mode (sexual<br>contacts)                          |              |                     |          | -0.814       | 0.443 (0.241-0.815) | 0.009    |
| HIV-1 subtype A6                                                |              |                     |          | -0.737       | 0.478 (0.236-0.970) | 0.041    |

TDRM, surveillance drug resistance mutations; NNRTI, non-nucleoside reverse transcriptase inhibitors; PI, protease inhibitors. First, univariate analysis was performed for potential predictors of TDRM (sex, age at diagnosis (<50, ≥50); birthplace (SSA, EEU/CA, Israel, WCEU/NA; transmission mode -MSM, heterosexual contacts, PWID; HIV-1 subtypes -B, A1, A6, C, other/recombinants). All statistically significant ( $p < 0.1$ ) predictors were included into the multivariate logistic regression analysis. The resultant coefficients and Odds ratio (OR) of 95% CI of the interactions (interactions are marked by "\*") and of the main effects, are displayed.

**Supplementary Table S6:** Proportion of most frequently detected DRM and patient demographics in the largest transmission clusters.

| Subtype   | Cluster number | # of sequences | Drug Class | Major DRM   | Risk group, n/N                                            | Birthplace, n/N                                           |
|-----------|----------------|----------------|------------|-------------|------------------------------------------------------------|-----------------------------------------------------------|
| <b>A6</b> | 1              | 68             | PI         | I47V 1/68   | 3/68 MSM;<br>62/68 PWID;<br>1/68 Hetero;<br>2/68 Unknown;  | 1/68 SSA;<br>46/68 EEU/CA;<br>18/68 IL;<br>3/68 Other;    |
|           |                |                | NRTI       | L210W 1/68  |                                                            |                                                           |
|           |                |                | NNRTI      | V179D 1/68  |                                                            |                                                           |
|           |                |                |            |             |                                                            |                                                           |
| <b>A1</b> | 2              | 43             | PI         | L33F 3/43   | 28/43 MSM;<br>4/43 PWID;<br>10/43 Hetero;<br>1/43 Unknown; | 2/43 EEU/CA;<br>3/43 WCEU/NA;<br>34/43 IL;<br>4/43 Other; |
|           |                |                | NRTI       | K70N 1/43   |                                                            |                                                           |
|           |                |                |            | T215I 1/43  |                                                            |                                                           |
|           |                |                | NNRTI      | K103N 15/43 |                                                            |                                                           |
|           |                |                |            | K103S 6/43  |                                                            |                                                           |
|           |                |                |            | E138A 1/43  |                                                            |                                                           |
|           |                |                |            | E138G 2/43  |                                                            |                                                           |
|           |                |                |            | E138Q 22/43 |                                                            |                                                           |
| <b>B</b>  | 1              | 76             | PI         | M46I 1/76   | 63/76 MSM;<br>7/76 PWID;<br>4/76 Hetero;<br>2/76 Unknown;  | 9/76 EEU/CA;<br>2/76 WCEU/NA;<br>62/76 IL;<br>3/76 Other; |
|           |                |                |            | L10F 1/76   |                                                            |                                                           |
|           |                |                | NRTI       | F77L 1/76   |                                                            |                                                           |
|           |                |                | NNRTI      | Y181C 3/76  |                                                            |                                                           |
|           |                |                |            | H221Y 3/76  |                                                            |                                                           |
|           | 2              | 52             | PI         | Q58E 11/52  | 47/52 MSM;<br>1/52 PWID;<br>4/52 Hetero;                   | 8/52 EEU/CA;<br>2/52 WCEU/NA;<br>42/52 IL;                |
|           |                |                | NRTI       | M184V 1/52  |                                                            |                                                           |
|           |                |                | NNRTI      | V179D 1/52  |                                                            |                                                           |
|           | 3              | 36             | PI         | M46I 1/36   | 23/36 MSM;<br>3/36 PWID;<br>10/36 Hetero;                  | 5/36 EEU/CA;<br>29/36 IL;<br>2/36 Other;                  |
|           |                |                |            | L33F 1/36   |                                                            |                                                           |
|           |                |                |            |             |                                                            |                                                           |

| Subtype | Cluster number | # of sequences | Drug Class | Major DRM   | Risk group, n/N                             | Birthplace, n/N                                                        |
|---------|----------------|----------------|------------|-------------|---------------------------------------------|------------------------------------------------------------------------|
|         | 4              | 30             | NNRTI      | K103N 17/30 | 25/30 MSM;<br>2/30 PWID;<br>3/30 Hetero;    | 1/30 SSA;<br>2/30 EEU/CA;<br>1/30 WCEU/NA;<br>24/30 IL;<br>2/30 Other; |
|         |                |                |            |             |                                             |                                                                        |
|         |                |                |            |             |                                             |                                                                        |
|         |                |                |            |             |                                             |                                                                        |
|         | 5              | 27             | PI         | L90M 25/27  | 22/27 MSM;<br>3/27 Hetero;<br>2/27 Unknown; | 1/27 SSA;<br>2/27 EEU/CA;<br>1/27 WCEU/NA;<br>21/27 IL;<br>2/27 Other; |
|         |                |                | NRTI       | V75I 1/27   |                                             |                                                                        |
|         |                |                | NNRTI      | E138Q 1/27  |                                             |                                                                        |
|         |                |                |            |             |                                             |                                                                        |
|         |                |                |            |             |                                             |                                                                        |
| C       | 1              | 21             | NNRTI      | K103N 1/21  | 12/21 MSM;<br>2/21 PWID;<br>7/21 Hetero;    | 2/21 EEU/CA;<br>16/21 IL;<br>3/21 Other;                               |
|         |                |                |            |             |                                             |                                                                        |
|         |                |                |            |             |                                             |                                                                        |

DRM, drug resistance mutations; NNRTI, non-nucleoside reverse transcriptase inhibitors; NRTI, nucleotide reverse transcriptase inhibitors; PI, protease inhibitors. Country of origin: SSA - Sub Saharan Africa; EEA/CA - Eastern Europe and Central Asia; WCEU/NA - Western and Central Europe and North America; IL- Israel; PWID - people who use injection drug; MSM – men who have sex with men; HETERO – heterosexual contacts.
